# Supplementary material for: In situ controllable synthesis of magnetite nanocrystals/CoSe2 hybrid nanobelts and their enhanced catalytic performance
Source: Royal Society of Chemistry journal article supplement (doi:10.1039/c0jm01547d), 2010-01-01
Supplement: c0jm01547d.pdf [file c0jm01547d.pdf]

## ***In situ* controllable synthesis of magnetite nanocrystals/CoSe<sub>2</sub> hybrid nanobelts and their enhanced catalytic performance**

Min-Rui Gao, Shuang Liu, Jun Jiang, Chunhua Cui, Wei-Tang Yao, Shu-Hong Yu\*

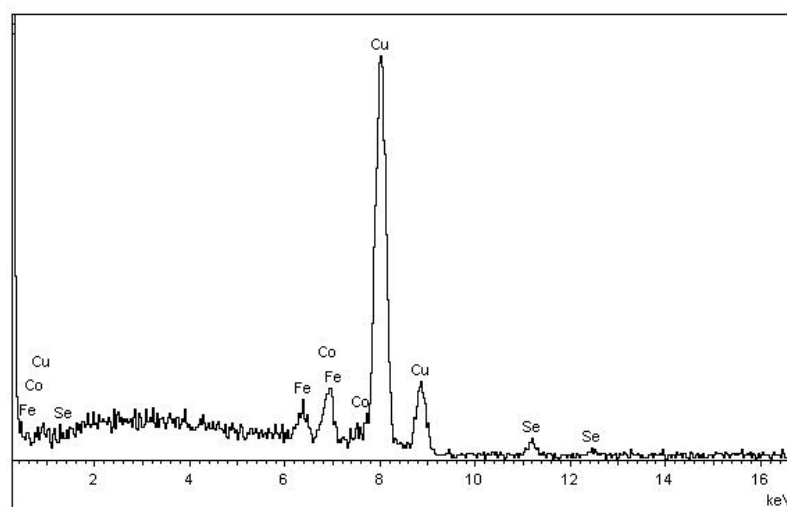

**Fig. S1** Energy-disperse X-ray spectrum (EDS) taken on the selected area of the Fe<sub>3</sub>O<sub>4</sub>-decorated CoSe<sub>2</sub> nanobelts prepared in the presence of  $3 \times 10^{-4}$  mol Fe(acac)<sub>3</sub>.

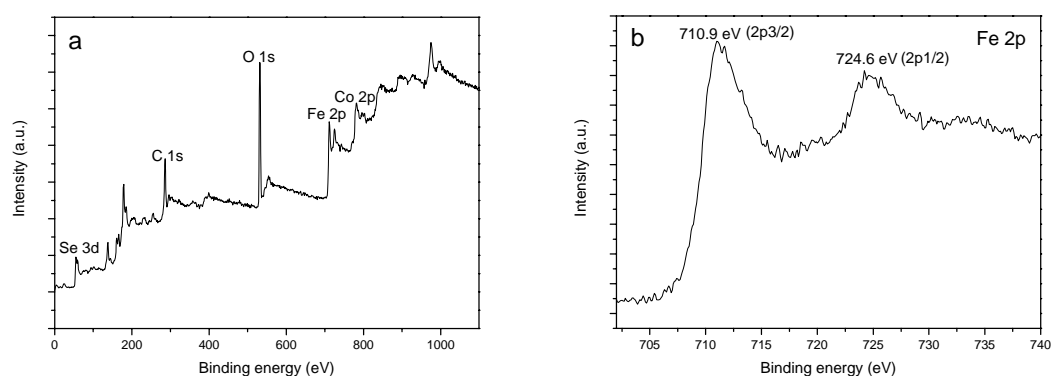

**Fig. S2** XPS spectra for the obtained Fe<sub>3</sub>O<sub>4</sub>-decorated CoSe<sub>2</sub> nanobelts. (a) Survey of the sample; (b) Survey of Fe 2p region. The sample was prepared in the presence of  $3 \times 10^{-4}$  mol Fe(acac)<sub>3</sub>. Only two peaks located at 710.9 eV and 724.6 eV could be observed in the Fe 2p spectrum, which could be assigned to Fe 2p<sub>3/2</sub> and Fe 2p<sub>1/2</sub> for Fe<sub>3</sub>O<sub>4</sub> (T. Fujii, F. M. F. de Groot, G. A. Sawatzky, *Phys. Rev. B*. **1999**, 59, 3195.), indicating the formation of Fe<sub>3</sub>O<sub>4</sub> in the composites.

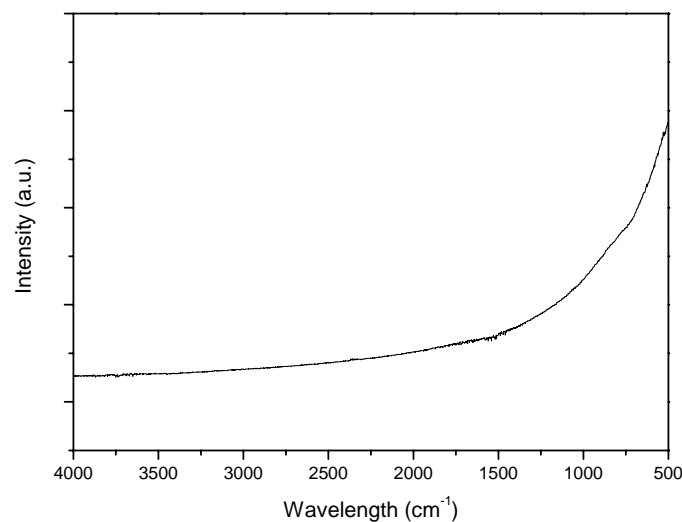

**Fig. S3** FTIR spectrum of Fe<sub>3</sub>O<sub>4</sub> NPs-decorated CoSe<sub>2</sub> hybrid NBs prepared in the presence of  $3 \times 10^{-4}$  Fe(acac)<sub>3</sub>.

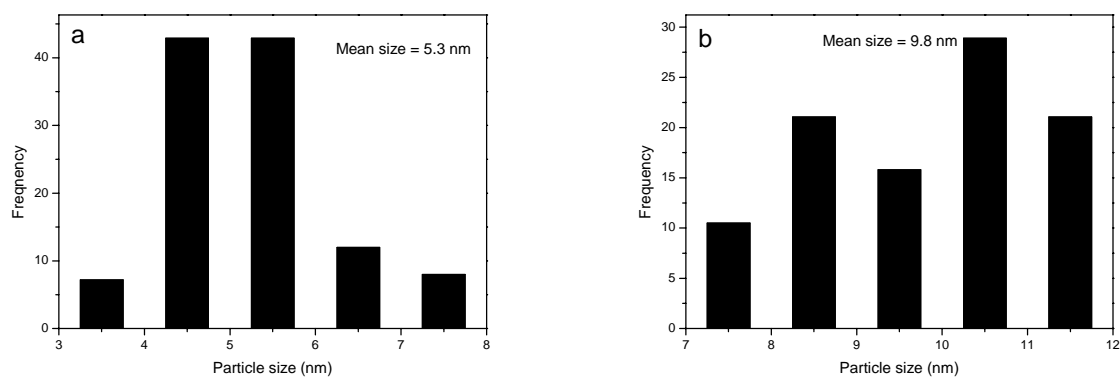

**Fig. S4** The size distribution of loaded Fe<sub>3</sub>O<sub>4</sub> NPs on hybrid CoSe<sub>2</sub>-DETA NBs with different initial Fe(acac)<sub>3</sub> concentration: (a)  $1.5 \times 10^{-4}$  and (b)  $6 \times 10^{-4}$ , respectively.

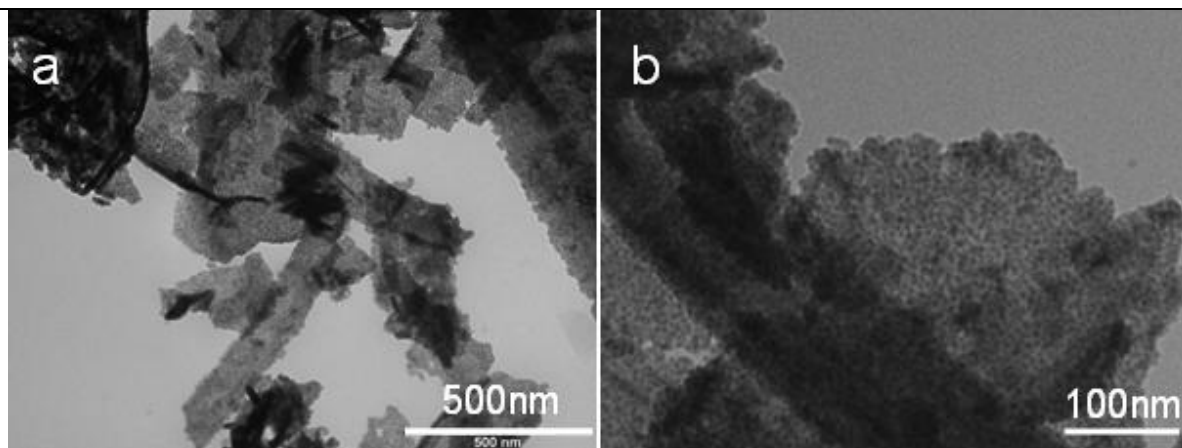

**Fig. S5** (a, b) TEM and HRTEM images of  $\text{Fe}_3\text{O}_4$ -decorated  $\text{CoSe}_2$  nanobelts after continuous strong ultrasonication treatment for 2 h.

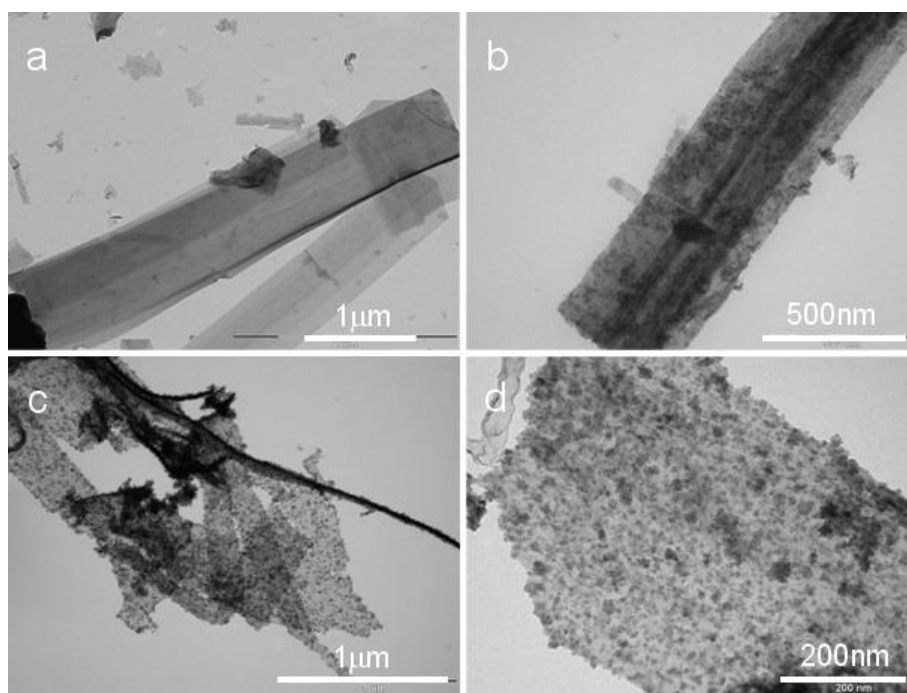

**Fig. S6** TEM image of the samples collected at early stages of the reaction in the present of  $3 \times 10^{-4}$  mol  $\text{Fe}(\text{acac})_3$ : (a) 260 °C for 30 min, (b) 278 °C for 5 min, (c) 278 °C for 10 min and (d) selective area magnification TEM image of (c).

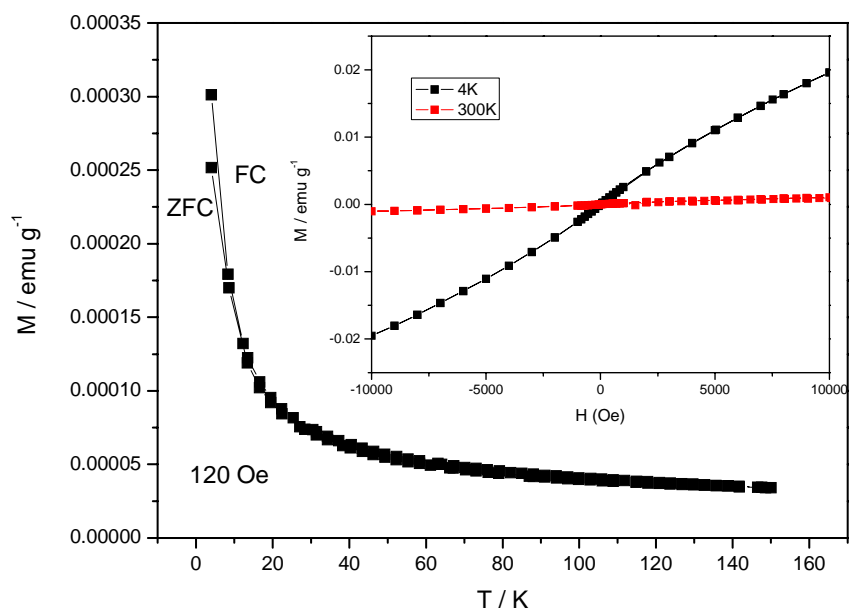

**Fig. S7** Temperature dependence of magnetization for original CoSe<sub>2</sub>-DETA nanobelts measured with applied field of 120 Oe after zero field cooling and field cooling. The inset shows the field dependence of the magnetization taken at 4 and 300 K.

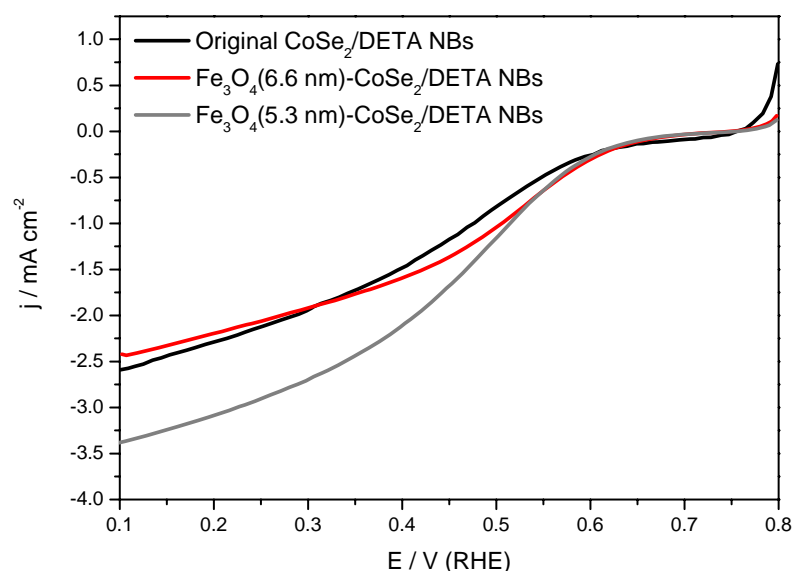

**Fig. S8** Polarization curves for the ORR on original CoSe<sub>2</sub>-DETA nanobelts, 6.6 nm Fe<sub>3</sub>O<sub>4</sub> NPs-decorated CoSe<sub>2</sub> nanobelts and 5.3 nm Fe<sub>3</sub>O<sub>4</sub> NPs-decorated CoSe<sub>2</sub> nanobelts recorded at room temperature in an O<sub>2</sub>-saturated 0.5 M H<sub>2</sub>SO<sub>4</sub> solution with a sweep rate of 10 mV/s and a rotation rate of 1600 rpm. 6.6 nm and 5.3 nm Fe<sub>3</sub>O<sub>4</sub> NPs-decorated CoSe<sub>2</sub> nanobelts prepared in the presence of  $3 \times 10^{-4}$  mol and  $1.5 \times 10^{-4}$  mol Fe(acac)<sub>3</sub>, respectively.
